# Supplementary material
Source: Springer Nature journal article supplement (https://www.springermedizin.de/resource/supplementary/12958_2011_820_MOESM5_ESM.pdf/9568926)

Overview

Attachment region

Non-attachment region

d7

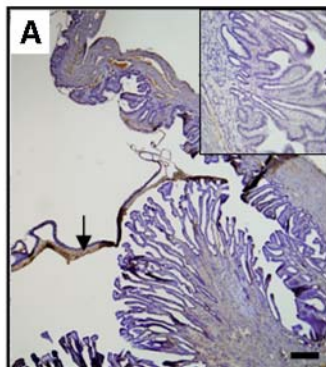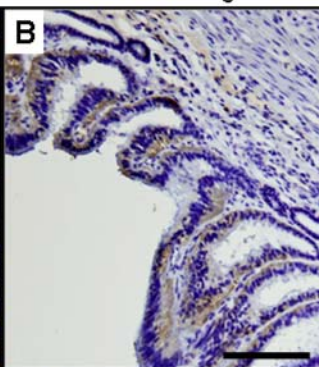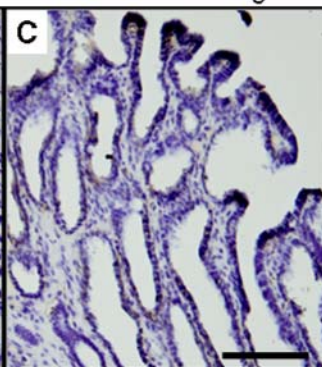

d8

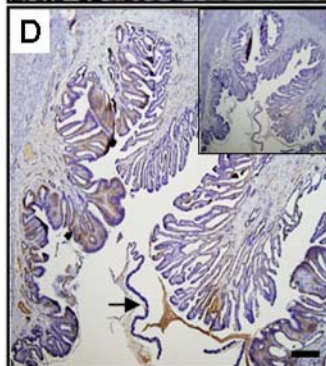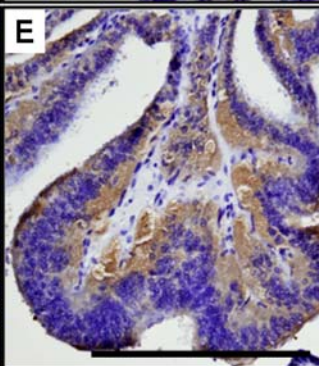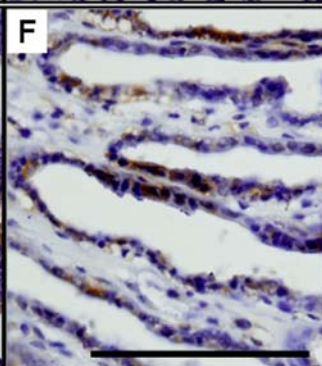

d10

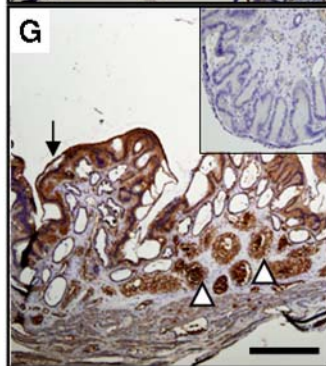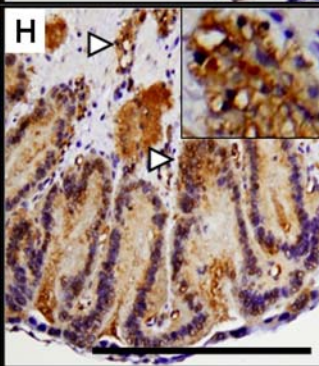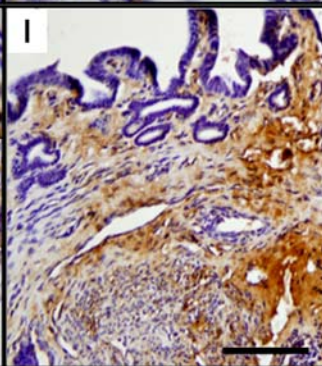

Pseudo-pregnant d8

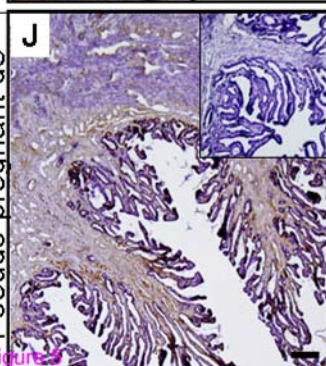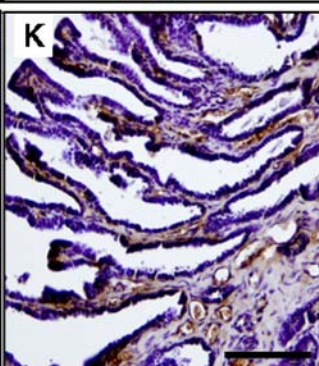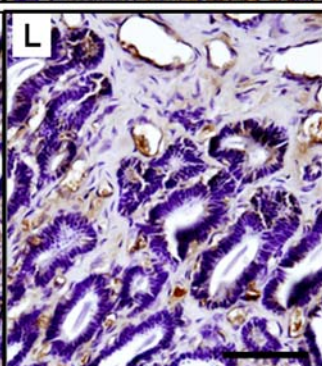

Supplement: MOESM5 [file 9568926]
